# Supplementary material
Source: PubMed Central journal article supplement (PMC4349061)
Supplement: f5e26ce228aae6eeaf685e1dae99dd60_genetics.114.165183-1.pdf [file f5e26ce228aae6eeaf685e1dae99dd60_genetics.114.165183-1.pdf]

## ***Online Resources***

Maize Genetics and Genomics Database (MaizeGDB):

<http://www.maizegdb.org/>

*Central database for maize genome sequence, annotation, identified genes, mutants*

Gramene:

<http://www.gramene.org/>

*Resource for comparative genomics across many plant species*

Maize Genetics Cooperation Stock Center (Maize Coop):

<http://maizecoop.cropsci.uiuc.edu/>

*Repository of freely available maize lines (characterized mutants, UniformMu, etc.)*

Germplasm Resources Information Network (GRIN):

<http://www.arts-grin.gov/>

*US national seed repository for most maize breeding stocks and northern landraces*

International Maize and Wheat Improvement Center (CIMMYT):

<http://www.cimmyt.org/en/>

*Mexican seed repository for tropical breeding stocks and landraces*

Iowa State Plant Transformation Facility:

<http://agron-www.agron.iastate.edu/ptf/>

*Fee for service transformation facility that will generate transgenic maize lines*

Maize Cell Genomics Database:

<http://maize.jcvi.org/cellgenomics/index.php>

[Database of available fluorescently-tagged maize lines and transactivation lines](http://maize.jcvi.org/cellgenomics/index.php)

UniformMu Transposon Resource:

<http://www.maizegdb.org/documentation/uniformmu/>

*Information on UniformMu line creation, database of available Mu-tagged lines*

Mu-Illumina Resource:

<http://teosinte.uoregon.edu/mu-illumina/>

*Database of Mu lines identified by Mu-Illumina*

Genome-wide Ac/Ds tagging project:

<http://acdstagging.org/>

*Database of genes tagged by Ac/Ds insertions and available lines*

Guide to Maize Mutant Phenotypes:

<http://mutants.maizegdb.org/>

*Photograph database of characterized maize kernel and plant mutant phenotypes*

Nested Association Mapping Recombination Inbred Lines:

<http://maizecoop.cropsci.uiuc.edu/nam-rils.php>

*Resource for obtaining and working with NAM recombinant inbred lines*

Panzea: Biology of Rare Alleles in Maize and its Wild Relatives:

<http://www.panzea.org/>

*Genomic database and resource for the many landraces of maize and its wild ancestors*

National Center for Biotechnology Information (Maize):

<http://www.ncbi.nlm.nih.gov/genome/?term=maize>

*NCBI resource for maize genome assembly, gene annotation, expression, and literature*
